# Supplementary material for: Mn(ii) silver-aptamer clusters for targeted MR imaging of tumors
Source: Royal Society of Chemistry journal article supplement (doi:10.1039/c6tb01146b), 2016-01-01
Supplement: c6tb01146b1.pdf [file c6tb01146b1.pdf]

Supporting

**Mn(II) silver-aptamer clusters as for target MR image of tumor**

**Wei-Yu Mu,<sup>a, b</sup> Xin-Xin Xiao,<sup>a</sup> Tian-Tian Chen,<sup>a</sup> Qiu-Yun Chen<sup>\*a, b</sup>**

<sup>a</sup> School of chemistry and chemical engineering, Jiangsu University, Zhenjiang, 212013, P.R. China. E-mail: [chemqy@ujs.edu.cn](mailto:chemqy@ujs.edu.cn); Fax: +86 0511 88791602; Tel: +86 0511 8879800

<sup>b</sup> Beijing National Laboratory for Molecular Science, Beijing, 100190, P.R. China.

\*Corresponding author: E-mail address: [Chenqy@ujs.edu.cn](mailto:Chenqy@ujs.edu.cn) (Q.Y. Chen)

**Table S1** Sequence of DNA

| Name              | Sequence5'-3'                   |
|-------------------|---------------------------------|
| DNA               | CCCACCCACCCACCCATGTTGTCTACGTGCT |
| DNA <sub>G1</sub> | ACAACAAGTATGTGGAGCAACTGTGTGG    |

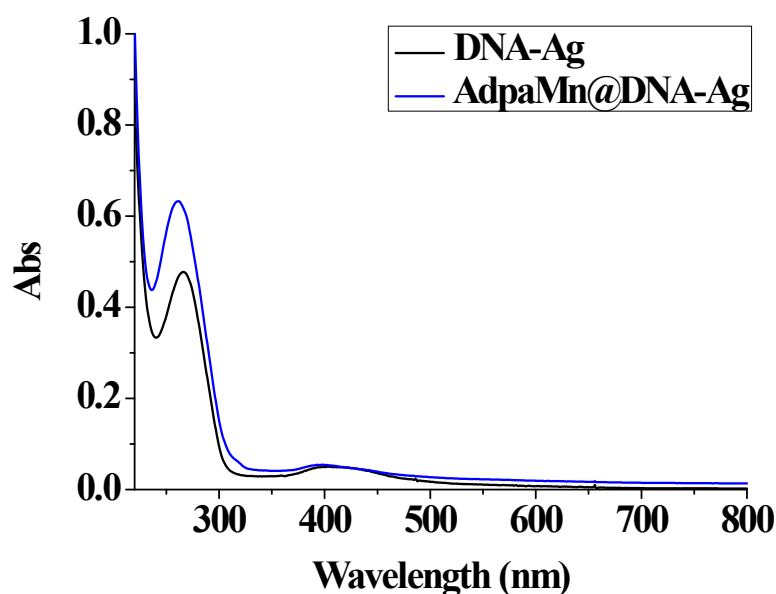

Fig. S1 The UV-vis spectra of DNA-Ag ( $C_{\text{DNA}}$ , 1  $\mu\text{M}$ ) and AdpaMn@DNA-Ag ( $C_{\text{DNA}}$ , 1  $\mu\text{M}$ ,  $C_{\text{Mn}}$ , 15  $\mu\text{M}$ ).

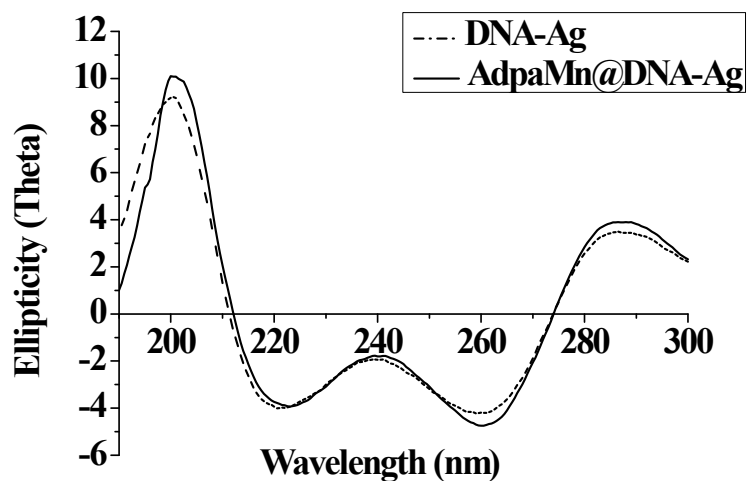

Fig. S2 The CD spectrum of DNA-AgNCs ( $C_{DNA}$ , 1  $\mu$ M, dashed line) and AdpaMn@DNA-AgNCs ( $C_{DNA}$ , 1  $\mu$ M, solid line).

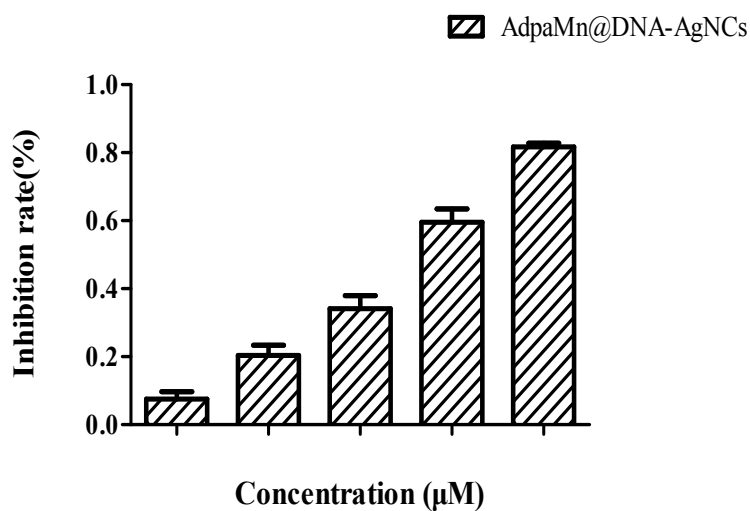

Fig. S3 The inhibition activity of AdpaMn@DNA-AgNCs ( $C_{Mn}$  = 1, 10, 25, 50, 75  $\mu$ M).

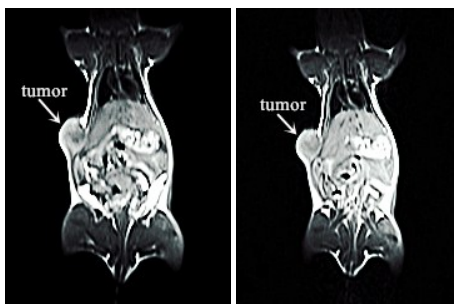

Fig. S4 T1-weighted fast-spin-echo-images of AdpaMn in vivo (TR/TE: 600 ms/9.9 ms, FOV: 10.9 $\times$ 9.9; left: 10 min, right: 30 min).
